# Supplementary material for: Exciton energy recycling from ZnO defect levels: towards electrically driven hybrid quantum-dot white light-emitting-diodes
Source: Royal Society of Chemistry journal article supplement (doi:10.1039/c5nr09261b), 2016-01-01
Supplement: c5nr09261b1.pdf [file c5nr09261b1.pdf]

**Supporting Information of** “Exciton energy recycling from ZnO defect levels: towards electrically driven hybrid quantum-dot white light-emitting-diodes”

Xin Zhao<sup>†a</sup>, Weizhen Liu<sup>†ab</sup>, Rui Chen<sup>a</sup>, Yuan Gao<sup>a</sup>, Binbin Zhu<sup>a</sup>, Hilmi Volkan Demir<sup>acd</sup>, Shijie Wang<sup>e</sup> and Handong Sun<sup>\*af</sup>

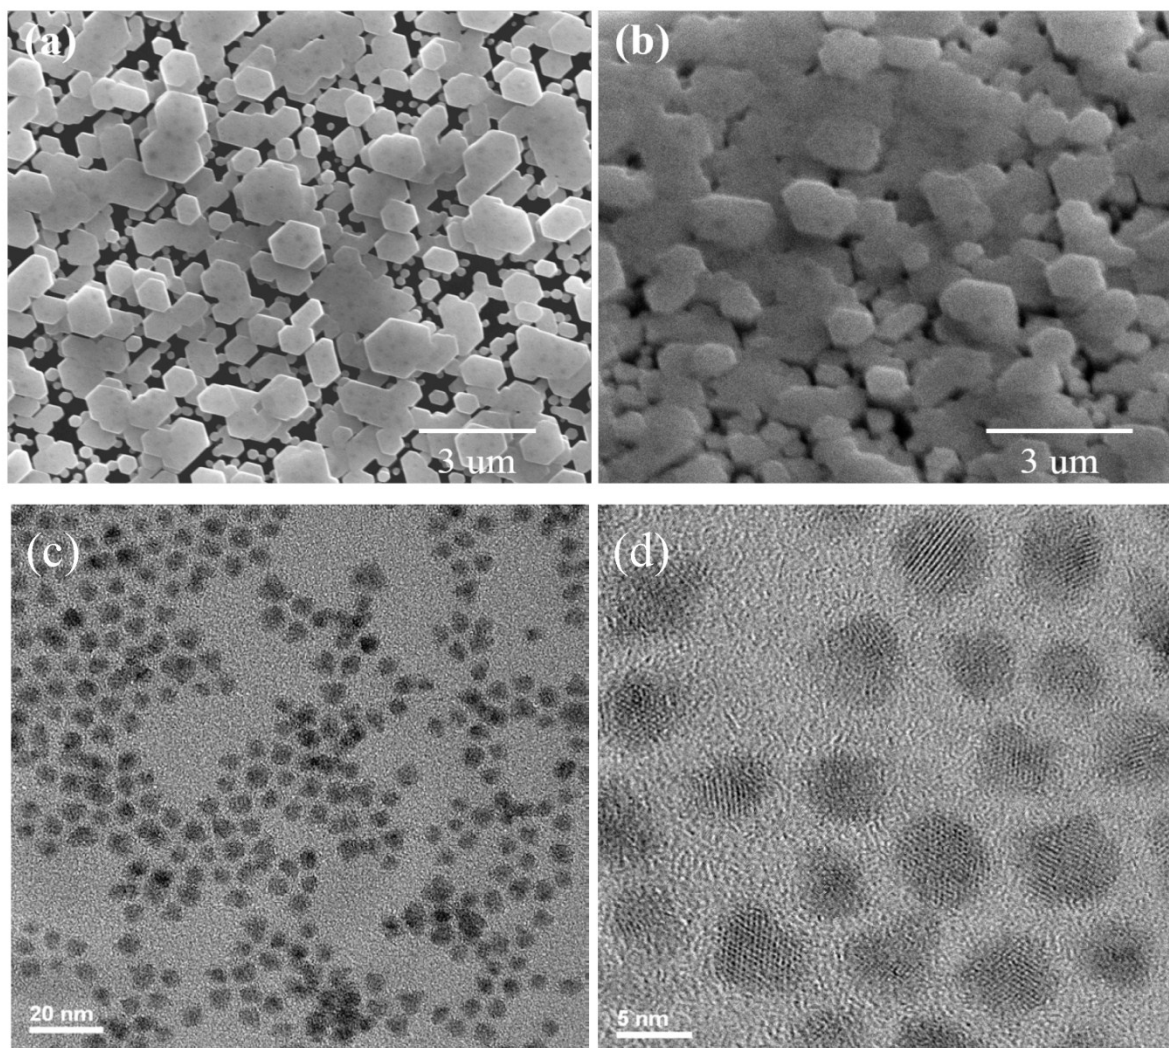

**Figure S1.** Top view SEM images of anneal ZnO Nanorods (a) before QDs coating and (b) after QDs coating. (c) TEM images of CdSe quantum dots (d) magnified view of image (c).
